# Supplementary material for: An aromatic–antiaromatic switch in P-heteroles. A small change in delocalisation makes a big reactivity difference
Source: Royal Society of Chemistry journal article supplement (doi:10.1039/b516836h), 2006-01-01
Supplement: b516836h.pdf [file b516836h.pdf]

## Supplementary Data

**An aromatic-antiaromatic switch in P-heteroles. A small change in delocalisation makes a big reactivity difference.**

László Nyulászi,<sup>\*a</sup> Oldamur Hollóczki,<sup>a</sup> Christophe Lescop,<sup>b</sup> Muriel Hissler<sup>b</sup> and Régis Réau<sup>\*b</sup>

**The Supplementary Data contains the following information**

**A./ A detailed description of the experimental procedure**

**B./ Total energies (in hartree) and optimized structures (in cartesian coordinates) of compounds 2a,c; 3a,c; 4a-e, 5a-e, 6a-e and 7a-e at the given levels of the theory. NIMAG=1 indicates that the structure is a first order saddle point.**

---

<sup>a</sup>Department of Inorganic Chemistry, Budapest University of Technology and Economics, H-1521 Budapest, Szt. Gellért tér 4, Hungary.

Fax : (+36)14633642; Tel (+36)14633281 ;

E-mail: [nyulaszi@mail.bme.hu](mailto:nyulaszi@mail.bme.hu)

<sup>b</sup>UMR 6509 CNRS-Université de Rennes 1, Institut de Chimie, Campus de Beaulieu, 35042 Rennes Cedex, France.

Fax: (+33)2-23236939; Tel: (+33)2-23235784;

E-mail: [regis.reau@univ-rennes1.fr](mailto:regis.reau@univ-rennes1.fr)

**A./ The detailed description of the experimental procedure for the diethylamine catalysed transformation of 2b. The same procedure holds for 2a:**

A xylene solution (10 mL) of 1,2,5-triphenylthiophosphole **2b** (100 mg; 2.5 mmol) and diethylamine (1 mL) was refluxed for 4 hours under an inert atmosphere of argon. The solution was subjected to column chromatography on silica gel. Xylene was first eluted with pentane, then a pentane (80)/ether (20) was used affording the corresponding phospholene **3b** (96 mg, 2.4 mmol, yield 96 %) as a pale brownish oil.

**2a** *B3LYP/6-31+G\*\*/B3LYP/3-21G\** : -2385.722799

|   |           |           |           |
|---|-----------|-----------|-----------|
| C | 0.000000  | 0.000000  | 0.000000  |
| C | 0.000000  | 0.000000  | 1.485583  |
| C | 1.304742  | 0.000000  | 2.259728  |
| C | 2.529506  | 0.386493  | 1.400900  |
| C | 2.515943  | -0.408926 | 0.085252  |
| C | 1.306827  | 0.028798  | -0.769443 |
| C | -1.241690 | -0.030152 | 2.064897  |
| C | -1.629969 | -0.072070 | 3.452483  |
| S | -0.510726 | -0.346424 | 4.793248  |
| C | -1.787604 | -0.267482 | 5.954995  |
| C | -3.005559 | -0.047808 | 5.362574  |
| C | -2.920001 | 0.060297  | 3.947716  |
| C | -1.240179 | -0.013724 | -0.581189 |
| C | -1.619567 | 0.054895  | -1.972783 |
| S | -0.538362 | 0.599900  | -3.260854 |
| C | -1.778032 | 0.432691  | -4.453601 |
| C | -2.954573 | -0.015947 | -3.908498 |
| C | -2.869522 | -0.226964 | -2.504448 |
| P | -2.507633 | -0.073874 | 0.739756  |
| S | -3.775485 | -1.558189 | 0.756364  |
| C | -3.275374 | 1.579649  | 0.730714  |
| C | -2.479667 | 2.735523  | 0.792472  |
| C | -3.078309 | 3.993802  | 0.778861  |
| C | -4.470655 | 4.108498  | 0.704090  |
| C | -5.263200 | 2.961671  | 0.642499  |
| C | -4.667987 | 1.697734  | 0.654545  |
| H | 1.217988  | -0.610419 | -1.655509 |
| H | 1.488443  | 1.053978  | -1.127510 |
| H | -3.680715 | -0.603582 | -1.898092 |
| H | -3.849791 | -0.195506 | -4.486556 |
| H | -1.575552 | 0.662123  | -5.488151 |
| H | -1.577198 | -0.383110 | 7.006780  |
| H | -3.931724 | 0.032914  | 5.913299  |
| H | -3.776163 | 0.217314  | 3.309408  |
| H | 1.466870  | -1.010010 | 2.666436  |
| H | 1.220629  | 0.680097  | 3.116011  |
| H | 3.443236  | 0.184353  | 1.970580  |
| H | 2.504614  | 1.460861  | 1.176977  |
| H | 3.437482  | -0.238423 | -0.482286 |
| H | 2.447936  | -1.481832 | 0.304644  |
| H | -5.270509 | 0.797308  | 0.607820  |
| H | -6.341939 | 3.047663  | 0.583882  |
| H | -4.932654 | 5.088929  | 0.694419  |
| H | -2.462451 | 4.884267  | 0.827828  |
| H | -1.401313 | 2.648210  | 0.854385  |

2c B3LYP/6-31+G\*\*/B3LYP/3-21G\* : -1776.290451

|   |           |           |           |
|---|-----------|-----------|-----------|
| C | 0.000000  | 0.000000  | 0.000000  |
| C | 0.000000  | 0.000000  | 1.409320  |
| N | 1.168169  | 0.000000  | 2.106324  |
| C | 2.331364  | -0.006778 | 1.429992  |
| C | 2.407255  | -0.018973 | 0.037833  |
| C | 1.211429  | -0.010907 | -0.684283 |
| C | -1.250829 | -0.015019 | 2.174371  |
| C | -1.417761 | 0.210792  | 3.512181  |
| C | -2.824212 | 0.032479  | 4.005377  |
| C | -3.161346 | 0.308191  | 5.457797  |
| C | -1.931956 | 0.316283  | 6.387607  |
| C | -0.831330 | 1.206403  | 5.788044  |
| C | -0.310565 | 0.578540  | 4.480378  |
| C | -3.721199 | -0.341138 | 3.041497  |
| C | -5.152480 | -0.628901 | 3.185641  |
| N | -5.708809 | -0.545688 | 4.423774  |
| C | -7.014453 | -0.828033 | 4.577799  |
| C | -7.846373 | -1.201503 | 3.523019  |
| C | -7.285880 | -1.286526 | 2.246738  |
| C | -5.935034 | -1.003086 | 2.073770  |
| P | -2.863579 | -0.423538 | 1.434308  |
| S | -3.540794 | 0.718140  | -0.007793 |
| C | -2.760975 | -2.192079 | 1.000667  |
| C | -2.342954 | -3.134129 | 1.955475  |
| C | -2.261142 | -4.482479 | 1.613145  |
| C | -2.594470 | -4.900595 | 0.320243  |
| C | -3.009504 | -3.966809 | -0.629981 |
| C | -3.092374 | -2.613624 | -0.292119 |
| H | -3.931628 | -0.391859 | 5.781480  |
| H | -3.636866 | 1.301006  | 5.493816  |
| H | -5.493507 | -1.045126 | 1.088759  |
| H | -7.893049 | -1.567946 | 1.394720  |
| H | -8.893645 | -1.413848 | 3.695226  |
| H | -7.407158 | -0.747952 | 5.586055  |
| H | -0.937075 | 0.040931  | -0.538442 |
| H | 1.221410  | -0.007031 | -1.767748 |
| H | 3.367654  | -0.030429 | -0.461411 |
| H | 3.235474  | -0.004593 | 2.029985  |
| H | 0.245681  | -0.339434 | 4.717693  |
| H | 0.408105  | 1.224977  | 3.974038  |
| H | 0.006134  | 1.318517  | 6.486189  |
| H | -1.238809 | 2.206330  | 5.590230  |
| H | -2.237308 | 0.681306  | 7.374898  |
| H | -1.546589 | -0.704219 | 6.514514  |
| H | -3.413727 | -1.876244 | -1.019505 |
| H | -3.267885 | -4.287880 | -1.632355 |
| H | -2.529877 | -5.950264 | 0.057937  |
| H | -1.938969 | -5.207206 | 2.351743  |
| H | -2.086052 | -2.812634 | 2.958029  |

**3a** B3LYP/6-31+G\*\*/B3LYP/3-21G\* : -2385.721418

|   |           |           |           |
|---|-----------|-----------|-----------|
| S | 0.000000  | 0.000000  | 0.000000  |
| C | 0.000000  | 0.000000  | 1.749238  |
| C | 1.284616  | 0.000000  | 2.235961  |
| C | 2.274990  | -0.007727 | 1.202102  |
| C | 1.731875  | -0.009090 | -0.055694 |
| C | -1.284492 | 0.044950  | 2.512107  |
| C | -1.455596 | -1.014586 | 3.607283  |
| C | -2.285120 | -0.536202 | 4.725375  |
| C | -2.728901 | -1.567799 | 5.741480  |
| C | -1.595961 | -2.601259 | 5.972127  |
| C | -1.188628 | -3.279240 | 4.645094  |
| C | -0.962562 | -2.261313 | 3.548063  |
| C | -2.538425 | 0.805270  | 4.753197  |
| C | -3.346407 | 1.565986  | 5.693803  |
| S | -4.805152 | 0.921304  | 6.441046  |
| C | -5.118470 | 2.416687  | 7.254662  |
| C | -4.163304 | 3.358659  | 6.971533  |
| C | -3.159063 | 2.880360  | 6.078909  |
| P | -1.615685 | 1.667264  | 3.431131  |
| S | -0.085263 | 2.749755  | 3.964978  |
| C | -2.839509 | 2.539087  | 2.406999  |
| C | -4.119932 | 1.994278  | 2.210942  |
| C | -5.037125 | 2.644598  | 1.386188  |
| C | -4.684107 | 3.839569  | 0.751832  |
| C | -3.414685 | 4.386867  | 0.949116  |
| C | -2.494452 | 3.741729  | 1.777429  |
| H | -1.510043 | 4.161224  | 1.950493  |
| H | -3.141419 | 5.315796  | 0.462500  |
| H | -5.398842 | 4.343452  | 0.111463  |
| H | -6.026173 | 2.224988  | 1.243487  |
| H | -4.401790 | 1.076646  | 2.715547  |
| H | -2.313928 | 3.464038  | 5.741536  |
| H | -4.170363 | 4.357799  | 7.383250  |
| H | -5.979126 | 2.521244  | 7.896612  |
| H | -2.998373 | -1.082973 | 6.683652  |
| H | -3.619455 | -2.091165 | 5.363059  |
| H | -1.926405 | -3.353482 | 6.696477  |
| H | -0.727040 | -2.081669 | 6.391620  |
| H | -0.368759 | -2.560040 | 2.689936  |
| H | -0.276110 | -3.870364 | 4.792513  |
| H | -1.974633 | -3.983943 | 4.330777  |
| H | -2.132797 | -0.050922 | 1.818930  |
| H | 1.508826  | 0.021126  | 3.291781  |
| H | 3.338937  | -0.006682 | 1.392030  |
| H | 2.252378  | -0.014532 | -1.000291 |

**3c** *B3LYP/6-31+G\*\*//B3LYP/3-21G\** : -1776.292505

|   |           |           |           |
|---|-----------|-----------|-----------|
| C | 0.000000  | 0.000000  | 0.000000  |
| C | 0.000000  | 0.000000  | 1.408732  |
| N | 1.167260  | 0.000000  | 2.105083  |
| C | 2.331110  | 0.009183  | 1.428759  |
| C | 2.407209  | 0.026052  | 0.036996  |
| C | 1.211491  | 0.015680  | -0.684893 |
| C | -1.261569 | 0.008529  | 2.169504  |
| C | -1.434566 | -0.310747 | 3.486516  |
| C | -2.808206 | -0.198706 | 4.000969  |
| C | -3.156903 | -0.596554 | 5.235120  |
| C | -2.179951 | -1.228849 | 6.201189  |
| C | -0.956148 | -1.802872 | 5.455622  |
| C | -0.375831 | -0.760354 | 4.472049  |
| C | -3.800415 | 0.408431  | 3.007490  |
| C | -4.337263 | 1.747421  | 3.465622  |
| C | -5.684868 | 2.074887  | 3.275148  |
| C | -6.154545 | 3.311370  | 3.718126  |
| C | -5.265313 | 4.189789  | 4.339744  |
| C | -3.936033 | 3.792351  | 4.482340  |
| N | -3.472331 | 2.599582  | 4.057730  |
| P | -2.844116 | 0.456866  | 1.386066  |
| S | -3.598248 | -0.728442 | 0.018092  |
| C | -2.638975 | 2.173461  | 0.819434  |
| C | -3.273812 | 2.596036  | -0.356567 |
| C | -3.102742 | 3.902953  | -0.815309 |
| C | -2.290295 | 4.791272  | -0.107067 |
| C | -1.651235 | 4.373037  | 1.063340  |
| C | -1.822748 | 3.069766  | 1.529985  |
| H | -6.348363 | 1.369694  | 2.789780  |
| H | -4.178792 | -0.454007 | 5.576445  |
| H | -0.936835 | -0.042011 | -0.539398 |
| H | 1.220802  | 0.014042  | -1.768347 |
| H | 3.367675  | 0.042140  | -0.462065 |
| H | 3.234857  | 0.006275  | 2.029272  |
| H | -4.633850 | -0.277071 | 2.823828  |
| H | -7.195051 | 3.581784  | 3.583042  |
| H | -5.591072 | 5.156697  | 4.701295  |
| H | -3.212713 | 4.451121  | 4.950578  |
| H | -1.849052 | -0.470196 | 6.928230  |
| H | -2.684059 | -2.018539 | 6.772346  |
| H | 0.497569  | -1.130157 | 3.938008  |
| H | -0.048638 | 0.126781  | 5.035446  |
| H | -1.262939 | -2.693567 | 4.894722  |
| H | -0.183328 | -2.102249 | 6.172075  |
| H | -1.345415 | 2.751733  | 2.446913  |
| H | -1.017504 | 5.060644  | 1.611383  |
| H | -2.151423 | 5.804284  | -0.467501 |
| H | -3.595248 | 4.223048  | -1.726164 |
| H | -3.881101 | 1.887532  | -0.908245 |

**4a** *B3LYP/6-311+G\*\** : -536.142401 *ccsd(t)/cc-PVDZ//B3LYP/6-311+G\*\** : -535.010357

|   |           |           |           |
|---|-----------|-----------|-----------|
| C | -1.240255 | -0.040521 | -0.977335 |
| C | -1.240217 | -0.040305 | 0.374127  |
| C | 0.088199  | -0.040562 | 0.993432  |
| C | 0.255698  | -0.035410 | 2.487064  |
| P | 0.453853  | 0.168483  | -1.597965 |
| C | 1.095115  | -0.045113 | 0.084847  |
| H | -2.124376 | -0.028055 | -1.600586 |
| H | -2.144545 | -0.038479 | 0.975372  |
| H | 2.148028  | -0.026796 | 0.335211  |
| H | 0.687268  | -1.121664 | -2.153233 |
| H | 1.308039  | -0.091738 | 2.770352  |
| H | -0.166265 | 0.874408  | 2.927542  |
| H | -0.267180 | -0.883457 | 2.942011  |

*B3LYP/6-31+G\*\*//B3LYP/3-21G\** : -536.070518

|   |           |           |           |
|---|-----------|-----------|-----------|
| C | 0.000000  | 0.000000  | 0.000000  |
| P | 0.000000  | 0.000000  | 1.818413  |
| C | 1.814494  | 0.000000  | 1.815088  |
| C | 2.307857  | -0.167708 | 0.560439  |
| C | 3.764197  | -0.340872 | 0.198764  |
| C | 1.257022  | -0.166495 | -0.475247 |
| H | -0.892577 | 0.028629  | -0.610952 |
| H | 1.501452  | -0.284288 | -1.525504 |
| H | 2.425288  | 0.021721  | 2.708596  |
| H | -0.233185 | 1.386616  | 2.030637  |
| H | 4.400815  | -0.258489 | 1.084148  |
| H | 3.935907  | -1.322810 | -0.260703 |
| H | 4.074652  | 0.423128  | -0.525179 |

**4b** *B3LYP/6-311+G\*\**: -934.368542 *ccsd(T)/cc-PVDZ//B3LYP/6-311+G\*\** : -932.690891

|   |           |           |           |
|---|-----------|-----------|-----------|
| C | 0.080133  | -0.610909 | -1.039087 |
| P | 0.079564  | -0.599077 | 0.777385  |
| S | 1.767711  | -0.588384 | 1.780573  |
| C | -0.680159 | 0.394796  | -1.508173 |
| C | -1.305678 | 1.220056  | -0.437971 |
| C | -1.023276 | 0.853792  | 0.819075  |
| H | 0.642202  | -1.317940 | -1.632977 |
| C | -0.916020 | 0.727533  | -2.950229 |
| H | -1.936574 | 2.066041  | -0.693013 |
| H | -1.362994 | 1.332761  | 1.726195  |
| H | -0.795640 | -1.665476 | 1.116937  |
| H | -0.378132 | 0.048864  | -3.612772 |
| H | -1.983228 | 0.672796  | -3.190141 |
| H | -0.592473 | 1.751641  | -3.165861 |

*B3LYP/6-31+G\*\*//B3LYP/3-21G\** : -934.272233

|   |           |           |           |
|---|-----------|-----------|-----------|
| C | 0.000000  | 0.000000  | 0.000000  |
| C | 0.000000  | 0.000000  | 1.349349  |
| C | 1.211825  | 0.000000  | 2.243469  |
| P | -1.700599 | -0.015286 | -0.630345 |
| C | -2.383893 | -0.026578 | 1.058671  |
| C | -1.375168 | -0.013119 | 1.947294  |
| S | -2.270102 | -1.338917 | -1.933809 |
| H | 0.880743  | -0.009757 | -0.626629 |
| H | -1.504800 | -0.019728 | 3.023846  |
| H | -3.438938 | -0.052521 | 1.291080  |
| H | -1.900221 | 1.334685  | -1.012592 |
| H | 2.134848  | -0.011397 | 1.658609  |
| H | 1.214038  | 0.890092  | 2.885644  |
| H | 1.200072  | -0.880926 | 2.898303  |



**4c** *B3LYP/6-311+G\*\**: -611.396414 *ccsd(T)/cc-PVDZ//B3LYP/6-311+G\*\**: -610.056016

|   |           |           |           |
|---|-----------|-----------|-----------|
| C | 0.994959  | 0.096550  | -0.454107 |
| C | 0.994955  | 0.096247  | 0.890174  |
| C | 2.199772  | 0.096347  | 1.780734  |
| P | -0.712839 | 0.131119  | -1.072230 |
| C | -1.391327 | 0.077528  | 0.621817  |
| C | -0.373285 | 0.087606  | 1.491076  |
| O | -1.176211 | -0.839590 | -2.110930 |
| H | 1.873489  | 0.092747  | -1.084717 |
| H | -0.495550 | 0.085410  | 2.570104  |
| H | -2.443576 | 0.063280  | 0.869259  |
| H | -0.901426 | 1.495614  | -1.433600 |
| H | 3.125617  | 0.072756  | 1.205256  |
| H | 2.210386  | 0.986915  | 2.418414  |
| H | 2.182886  | -0.772449 | 2.448006  |

*B3LYP/6-31+G\*//B3LYP/3-21G\**: -611.305038

|   |           |           |           |
|---|-----------|-----------|-----------|
| C | 0.000000  | 0.000000  | 0.000000  |
| P | 0.000000  | 0.000000  | 1.818437  |
| O | 1.287238  | 0.000000  | 2.590726  |
| C | -0.816236 | 0.970548  | -0.460541 |
| C | -1.451871 | 1.782567  | 0.622609  |
| C | -1.123349 | 1.439873  | 1.879956  |
| C | -1.110783 | 1.281057  | -1.899304 |
| H | 0.562989  | -0.693159 | -0.615364 |
| H | -2.130624 | 2.595266  | 0.369304  |
| H | -1.480011 | 1.917296  | 2.785526  |
| H | -0.865518 | -1.080537 | 2.146854  |
| H | -0.552946 | 0.627518  | -2.575827 |
| H | -2.182005 | 1.165834  | -2.112901 |
| H | -0.850429 | 2.322841  | -2.131122 |

**4d** *B3LYP/6-311+G\*\**: -575.396911 *ccsd(T)/cc-PVDZ//B3LYP/6-311+G\*\** : -574.127405

|   |           |           |           |
|---|-----------|-----------|-----------|
| C | -0.395940 | 0.802936  | -2.599275 |
| P | -0.395254 | 0.802082  | -0.917439 |
| C | 1.244821  | 0.802218  | -0.120317 |
| C | 1.256053  | -0.048770 | 0.913791  |
| C | -0.007006 | -0.801940 | 1.153406  |
| C | -0.076299 | -1.816410 | 2.256749  |
| C | -0.987277 | -0.470268 | 0.296668  |
| H | 2.065880  | 1.418985  | -0.456805 |
| H | 2.122578  | -0.212426 | 1.547600  |
| H | -1.979739 | -0.903221 | 0.279716  |
| H | -1.120922 | 1.927557  | -0.466052 |
| H | -1.311501 | 1.119041  | -3.085551 |
| H | 0.197640  | 0.051945  | -3.107411 |
| H | -1.053725 | -2.298804 | 2.295865  |
| H | 0.686010  | -2.591741 | 2.119395  |
| H | 0.116467  | -1.349162 | 3.228702  |

*B3LYP/6-31+G\*//B3LYP/3-21G\** : -575.312779

|   |           |           |           |
|---|-----------|-----------|-----------|
| C | 0.000000  | 0.000000  | 0.000000  |
| P | 0.000000  | 0.000000  | 1.663089  |
| C | 1.411466  | 0.000000  | 2.872477  |
| C | 1.272508  | 0.989854  | 3.774177  |
| C | 2.204851  | 1.330892  | 4.909187  |
| C | -0.720931 | 1.448445  | 2.507614  |
| C | 0.029458  | 1.805503  | 3.562421  |
| H | -1.638330 | 1.922746  | 2.188802  |
| H | -0.205895 | 2.624463  | 4.233772  |
| H | 2.240547  | -0.696372 | 2.843566  |
| H | -0.674589 | -1.151540 | 2.121074  |
| H | -0.019773 | -0.946127 | -0.528585 |
| H | 0.324552  | 0.876803  | -0.548045 |
| H | 3.072855  | 0.666477  | 4.918444  |
| H | 2.557825  | 2.366782  | 4.817952  |
| H | 1.686869  | 1.242440  | 5.873213  |

**4e** *B3LYP/6-311+G\*\**: -591.478925 *ccsd(T)/cc-PVDZ//B3LYP/6-311+G\*\** : -590.175561

|   |           |           |           |
|---|-----------|-----------|-----------|
| C | 1.020164  | 0.117952  | -0.448213 |
| C | 1.019948  | 0.117039  | 0.896543  |
| C | 2.223905  | 0.118088  | 1.790367  |
| P | -0.703695 | 0.136716  | -1.068189 |
| C | -1.363660 | 0.086158  | 0.618691  |
| C | -0.347836 | 0.106492  | 1.490729  |
| N | -1.350973 | -0.939022 | -2.014203 |
| H | 1.903483  | 0.119977  | -1.073533 |
| H | -0.478164 | 0.101426  | 2.568537  |
| H | -2.417142 | 0.054210  | 0.856528  |
| H | -0.815003 | 1.521241  | -1.425178 |
| H | -1.089851 | -0.901965 | -2.993584 |
| H | 3.150500  | 0.098235  | 1.215527  |
| H | 2.232911  | 1.007467  | 2.429824  |
| H | 2.210378  | -0.752548 | 2.455434  |

*B3LYP/6-31+G\*\*//B3LYP/3-21G\** : HF=-591.388341

|   |           |           |           |
|---|-----------|-----------|-----------|
| C | 0.000000  | 0.000000  | 0.000000  |
| C | 0.000000  | 0.000000  | 1.349170  |
| C | 1.206878  | 0.000000  | 2.251833  |
| P | -1.717755 | 0.040901  | -0.627258 |
| C | -2.384490 | -0.005692 | 1.052849  |
| C | -1.378280 | 0.004449  | 1.943240  |
| N | -2.388106 | -1.002946 | -1.569926 |
| H | 0.894646  | 0.001375  | -0.609496 |
| H | -1.510306 | 0.003666  | 3.019579  |
| H | -3.438397 | -0.022813 | 1.290849  |
| H | -1.791165 | 1.442948  | -0.923110 |
| H | -2.116509 | -1.137288 | -2.546142 |
| H | 2.133189  | -0.030953 | 1.672266  |
| H | 1.217422  | 0.899726  | 2.880869  |
| H | 1.182710  | -0.870328 | 2.920823  |

**5a** *B3LYP/6-311+G\*\**: -536.134835 *ccsd(T)/cc-PVDZ//B3LYP/6-311+G\*\** : -535.001991

|   |           |           |           |
|---|-----------|-----------|-----------|
| C | -1.252614 | 0.013610  | -0.882764 |
| P | -1.357623 | 0.209703  | 0.943026  |
| C | 0.512721  | -0.028697 | 1.066567  |
| C | 1.067329  | -0.158978 | -0.347663 |
| C | -0.007254 | -0.194738 | -1.339053 |
| H | -2.130659 | 0.017365  | -1.517876 |
| H | 0.221267  | -0.366586 | -2.386841 |
| C | 2.370603  | -0.248574 | -0.647267 |
| H | 0.976485  | 0.790266  | 1.618908  |
| H | -1.389213 | 1.638589  | 0.967792  |
| H | 3.137838  | -0.201892 | 0.117128  |
| H | 2.703790  | -0.371725 | -1.671904 |
| H | 0.700133  | -0.947305 | 1.628482  |

**5b** *B3LYP/6-311+G\*\**: -934.372212 *ccsd(T)/cc-PVDZ//B3LYP/6-311+G\*\** : -932.690891

|   |           |           |           |
|---|-----------|-----------|-----------|
| C | 0.111791  | -0.600244 | -1.131554 |
| P | 0.112698  | -0.599550 | 0.728539  |
| S | 1.820923  | -0.598069 | 1.694974  |
| C | -0.831814 | 0.516060  | -1.556068 |
| C | -1.332321 | 1.275406  | -0.407418 |
| C | -0.972164 | 0.853805  | 0.814941  |
| C | -1.172335 | 0.783166  | -2.822519 |
| H | -0.192920 | -1.574763 | -1.517287 |
| H | -1.968269 | 2.140302  | -0.571052 |
| H | -1.251855 | 1.322922  | 1.748694  |
| H | -0.728301 | -1.686991 | 1.078951  |
| H | -0.786496 | 0.205373  | -3.654182 |
| H | -1.852435 | 1.594053  | -3.058892 |
| H | 1.136085  | -0.407701 | -1.458192 |

**5c** *B3LYP/6-311+G\*\**: -611.402107 *ccsd(T)/cc-PVDZ//B3LYP/6-311+G\*\** : -610.059050

|   |           |           |           |
|---|-----------|-----------|-----------|
| C | 0.456162  | -0.695921 | -0.831206 |
| P | 0.348932  | -0.659101 | 1.017080  |
| O | 1.620188  | -0.654124 | 1.805196  |
| C | -0.462525 | 0.408512  | -1.331137 |
| C | -1.013880 | 1.200275  | -0.226528 |
| C | -0.715078 | 0.808115  | 1.023074  |
| H | 0.186420  | -1.674921 | -1.231374 |
| C | -0.751752 | 0.641694  | -2.616879 |
| H | -1.640184 | 2.060045  | -0.446473 |
| H | -1.049384 | 1.306050  | 1.923945  |
| H | -0.513790 | -1.735339 | 1.361976  |
| H | -0.331375 | 0.043598  | -3.416931 |
| H | -1.424845 | 1.443033  | -2.901610 |
| H | 1.500107  | -0.499008 | -1.091245 |

**5d** *B3LYP/6-311+G\*\**: -575.400751 *ccsd(T)/cc-PVDZ//B3LYP/6-311+G\*\** : -574.128188

|   |           |           |           |
|---|-----------|-----------|-----------|
| C | -0.362384 | 0.721854  | -2.608472 |
| P | -0.362339 | 0.722114  | -0.937363 |
| C | 1.252994  | 0.722049  | -0.091161 |
| C | 1.276770  | -0.071610 | 0.990023  |
| C | 0.046686  | -0.804418 | 1.311080  |
| C | -0.110766 | -1.504789 | 2.441719  |
| C | -0.991766 | -0.642027 | 0.220740  |
| H | 2.082017  | 1.321656  | -0.443846 |
| H | 2.147438  | -0.177590 | 1.630938  |
| H | -1.986844 | -0.410074 | 0.605474  |
| H | -1.082846 | 1.856104  | -0.507082 |
| H | -1.179309 | 1.219044  | -3.113125 |
| H | 0.202843  | -0.023700 | -3.152047 |
| H | -1.031158 | -2.031210 | 2.666085  |
| H | 0.683931  | -1.564488 | 3.178161  |
| H | -1.070194 | -1.547807 | -0.387688 |

**5e** *B3LYP/6-311+G\*\** : -591.484060 *ccsd(T)/cc-PVDZ//B3LYP/6-311+G\*\** : -590.178038

|   |           |           |           |
|---|-----------|-----------|-----------|
| C | 0.426494  | -0.701578 | -0.866322 |
| P | 0.264726  | -0.695303 | 0.995575  |
| N | 1.501728  | -0.741520 | 1.961366  |
| C | -0.427887 | 0.453758  | -1.360750 |
| C | -0.853706 | 1.319075  | -0.254413 |
| C | -0.571378 | 0.906662  | 0.990678  |
| H | 0.139453  | -1.658898 | -1.304993 |
| C | -0.768097 | 0.671367  | -2.636981 |
| H | -1.380233 | 2.244316  | -0.468620 |
| H | -0.816004 | 1.442320  | 1.898091  |
| H | -0.774882 | -1.656293 | 1.202303  |
| H | 1.862928  | -1.654910 | 2.210950  |
| H | -0.444573 | 0.014621  | -3.436060 |
| H | -1.386545 | 1.518224  | -2.914447 |
| H | 1.484311  | -0.524908 | -1.083671 |

**6a** *B3LYP/6-311+G\*\** : -536.004874 *ccsd(T)/cc-PVDZ//B3LYP/6-311+G\*\** : -534.870465  
*NIMAG=1*

|   |           |           |           |
|---|-----------|-----------|-----------|
| C | -2.381315 | -0.245508 | 0.170603  |
| C | -1.046466 | 0.142190  | -0.127792 |
| C | -0.266747 | -1.053040 | -0.176363 |
| P | 1.536300  | -0.568777 | -0.014786 |
| C | -0.312101 | 1.381846  | -0.149688 |
| C | 1.016099  | 1.189314  | 0.058354  |
| H | -1.584095 | -1.566660 | 0.171233  |
| H | -2.541250 | -0.621837 | 1.176689  |
| H | -3.256013 | 0.266417  | -0.235003 |
| H | 1.795925  | -0.727229 | 1.378810  |
| H | -0.789715 | 2.355310  | -0.144909 |
| H | 1.707079  | 1.990899  | 0.293026  |
| H | -0.433251 | -1.654061 | -1.068732 |

**6b** *B3LYP/6-311+G\*\** : -934.233936 *ccsd(T)/cc-PVDZ//B3LYP/6-311+G\*\** : -932.553706  
*NIMAG=1*

|   |           |           |           |
|---|-----------|-----------|-----------|
| C | -0.841595 | 0.247852  | -2.951011 |
| C | -0.845979 | 0.227633  | -1.535922 |
| C | 0.502436  | 0.199125  | -1.093566 |
| P | 0.472927  | -0.481559 | 0.619868  |
| S | 1.504202  | 0.387696  | 2.045944  |
| C | -1.873378 | 0.049731  | -0.512523 |
| C | -1.371416 | -0.384502 | 0.658977  |
| H | 0.632511  | 0.224617  | -2.569854 |
| H | -0.465556 | -0.647954 | -3.437038 |
| H | -1.603135 | 0.762100  | -3.539841 |
| H | 0.683546  | -1.880882 | 0.500351  |
| H | -2.933074 | 0.133647  | -0.728873 |
| H | -1.954041 | -0.742601 | 1.498029  |
| H | 1.058214  | 1.132282  | -1.151619 |

**6c** *B3LYP/6-311+G\*\** : -611.261816 *ccsd(T)/cc-PVDZ//B3LYP/6-311+G\*\** : -609.918699  
*NIMAG=1*

|   |           |           |           |
|---|-----------|-----------|-----------|
| C | 0.554066  | -0.449318 | -2.624634 |
| C | 0.547119  | -0.427055 | -1.210100 |
| C | 1.591335  | -0.436668 | -0.181310 |
| C | 1.170866  | 0.070362  | 0.992298  |
| P | -0.619884 | 0.532245  | 0.924786  |
| O | -1.539348 | 0.070563  | 2.009874  |
| C | -0.772590 | -0.153904 | -0.767610 |
| H | -0.893786 | -0.172235 | -2.254957 |
| H | 0.340080  | 0.495650  | -3.116288 |
| H | 1.228457  | -1.082825 | -3.203786 |
| H | -0.548619 | 1.946499  | 0.781619  |
| H | 2.619334  | -0.704422 | -0.402567 |
| H | 1.815545  | 0.315082  | 1.827349  |
| H | -1.492740 | -0.966429 | -0.834016 |

**6d** *B3LYP/6-311+G\*\** : -575.259117 *ccsd(T)/cc-PVDZ//B3LYP/6-311+G\*\** : -573.986120  
*NIMAG=1*

|   |           |           |           |
|---|-----------|-----------|-----------|
| C | -0.592282 | 0.422936  | -2.639882 |
| C | -0.607816 | 0.327460  | -1.225539 |
| C | 0.746011  | 0.223054  | -0.787217 |
| P | 0.656990  | -0.515106 | 0.886650  |
| C | 1.499319  | 0.325964  | 2.072774  |
| C | -1.632272 | 0.183226  | -0.203398 |
| C | -1.156089 | -0.294099 | 0.968983  |
| H | 0.877113  | 0.309437  | -2.257699 |
| H | -0.274931 | -0.471722 | -3.167797 |
| H | -1.319068 | 1.011314  | -3.203234 |
| H | 0.740362  | -1.939676 | 0.631745  |
| H | -2.685340 | 0.346448  | -0.405811 |
| H | -1.773462 | -0.616754 | 1.797848  |
| H | 1.309953  | 1.153948  | -0.790069 |
| H | 1.197274  | 0.217379  | 3.106302  |
| H | 2.532025  | 0.584967  | 1.874644  |

**6e** *B3LYP/6-311+G\*\**: -591.345455 *ccsd(T)/cc-PVDZ//B3LYP/6-311+G\*\** : -590.039385  
*NIMAG=1*

|   |           |           |           |
|---|-----------|-----------|-----------|
| C | -0.571150 | 0.351322  | -2.637627 |
| C | -0.610687 | 0.308890  | -1.222467 |
| C | 0.722213  | 0.275846  | -0.741282 |
| P | 0.671778  | -0.426093 | 0.937610  |
| N | 1.601000  | 0.356150  | 1.935664  |
| C | -1.666109 | 0.118486  | -0.227190 |
| C | -1.190645 | -0.325749 | 0.952573  |
| H | 0.891315  | 0.329338  | -2.216874 |
| H | -0.182277 | -0.537724 | -3.126078 |
| H | -1.325798 | 0.865051  | -3.236046 |
| H | 0.813312  | -1.845860 | 0.819167  |
| H | -2.719453 | 0.200367  | -0.476018 |
| H | -1.809524 | -0.697115 | 1.761197  |
| H | 1.282988  | 1.207578  | -0.767763 |
| H | 1.664036  | 0.003929  | 2.884570  |

**7a** *B3LYP/6-31+G\*//B3LYP/3-21G\** : -1072.053085  
*NIMAG=1*

|   |           |           |           |
|---|-----------|-----------|-----------|
| C | 0.000000  | 0.000000  | 0.000000  |
| C | 0.000000  | 0.000000  | 1.388460  |
| C | 1.124550  | 0.000000  | 2.240803  |
| P | 0.635060  | 0.265430  | 3.953567  |
| C | -1.109213 | -0.008559 | 3.503853  |
| C | -1.254930 | -0.044880 | 2.166163  |
| C | 2.129909  | -2.752540 | 0.747327  |
| C | 1.026778  | -3.708752 | 0.631271  |
| C | -0.359973 | -3.211109 | 0.773368  |
| P | -1.482985 | -4.710688 | 0.662276  |
| C | -0.074509 | -5.741575 | 0.177823  |
| C | 1.123079  | -5.075822 | 0.321978  |
| H | 3.116770  | -3.215594 | 0.702565  |
| H | 0.917507  | 0.108289  | -0.564223 |
| H | 2.036393  | -1.996331 | -0.052525 |
| H | -0.929182 | 0.052157  | -0.553983 |
| H | 2.025286  | -2.133573 | 1.666053  |
| H | -0.566589 | -2.409843 | 0.020817  |
| H | 2.129374  | 0.182671  | 1.883980  |
| H | -0.490436 | -2.677414 | 1.723476  |
| H | 0.933456  | -0.977974 | 4.594499  |
| H | -2.086283 | -4.513277 | -0.614631 |
| H | -0.157224 | -6.783333 | -0.103841 |
| H | -1.923926 | -0.023184 | 4.216265  |
| H | -2.216972 | -0.089395 | 1.664470  |
| H | 2.084381  | -5.559627 | 0.178818  |



**7b** B3LYP/6-31+G\*\*/B3LYP/3-21G\* : -1868.466095

NIMAG=1

|   |           |           |           |
|---|-----------|-----------|-----------|
| C | 0.000000  | 0.000000  | 0.000000  |
| C | 0.000000  | 0.000000  | 1.376739  |
| C | 1.135322  | 0.000000  | 2.229441  |
| P | 0.627251  | 0.265491  | 3.937619  |
| S | 1.201109  | 1.940481  | 4.817129  |
| C | -1.267010 | -0.024389 | 2.158680  |
| C | -1.133879 | 0.069215  | 3.492988  |
| C | 0.353144  | -3.257323 | 2.082459  |
| C | 1.402627  | -3.725091 | 1.150814  |
| C | 2.002461  | -2.746790 | 0.242209  |
| P | -0.051359 | -4.715902 | 3.170019  |
| C | 1.161520  | -5.770106 | 2.328839  |
| C | 1.803912  | -5.071915 | 1.333616  |
| S | 0.030399  | -4.538804 | 5.125464  |
| H | 2.771733  | -3.162378 | -0.414580 |
| H | 0.918033  | 0.109205  | -0.568315 |
| H | 1.223091  | -2.224503 | -0.354596 |
| H | -0.930731 | -0.012196 | -0.560040 |
| H | 2.425915  | -1.918926 | 0.850462  |
| H | -0.531346 | -2.858347 | 1.562142  |
| H | 2.140102  | 0.221301  | 1.888314  |
| H | 0.733145  | -2.380860 | 2.661287  |
| H | 0.950807  | -0.883844 | 4.696915  |
| H | -1.307592 | -5.148834 | 2.674412  |
| H | 1.402583  | -6.779569 | 2.641543  |
| H | -1.944650 | 0.097535  | 4.212418  |
| H | -2.225326 | -0.084353 | 1.646261  |
| H | 2.599495  | -5.505326 | 0.730545  |

7c B3LYP/6-31+G\*\*/B3LYP/3-21G\* : -1222.527912

NIMAG=1

|   |           |           |           |
|---|-----------|-----------|-----------|
| C | 0.000000  | 0.000000  | 0.000000  |
| C | 0.000000  | 0.000000  | 1.387261  |
| C | 1.295676  | 0.000000  | 2.155537  |
| C | 1.169489  | 0.052184  | 3.490562  |
| P | -0.588190 | 0.108056  | 3.964285  |
| O | -1.149842 | -0.892747 | 4.935290  |
| C | -1.105908 | 0.107253  | 2.247173  |
| C | 0.210553  | 3.024457  | 0.505116  |
| C | -1.127070 | 3.627926  | 0.424599  |
| C | -2.303939 | 2.824712  | 0.796902  |
| P | 1.387894  | 4.281211  | -0.153824 |
| C | 0.065295  | 5.481436  | -0.449492 |
| C | -1.149534 | 4.963934  | -0.083811 |
| O | 2.601579  | 4.659910  | 0.643185  |
| H | -3.218690 | 3.415239  | 0.895884  |
| H | -0.926859 | -0.060436 | -0.559730 |
| H | -2.466864 | 2.035003  | 0.042610  |
| H | 0.923559  | -0.143904 | -0.551726 |
| H | -2.085098 | 2.245762  | 1.724224  |
| H | 0.225223  | 2.007788  | -0.015157 |
| H | -2.128203 | -0.012222 | 1.915804  |
| H | 0.454944  | 2.722724  | 1.536942  |
| H | -0.732138 | 1.456172  | 4.391799  |
| H | 1.649871  | 3.799856  | -1.463814 |
| H | 0.201881  | 6.461919  | -0.885191 |
| H | 1.996693  | 0.060409  | 4.187851  |
| H | 2.239796  | -0.040706 | 1.623145  |
| H | -2.084383 | 5.505388  | -0.179485 |

**7d** B3LYP/6-31+G\*\*/B3LYP/3-21G\* : -1150.550884

NIMAG=1

|   |           |           |           |
|---|-----------|-----------|-----------|
| C | 0.000000  | 0.000000  | 0.000000  |
| P | 0.000000  | 0.000000  | 1.668474  |
| C | 1.658530  | 0.000000  | 2.514303  |
| C | 1.606478  | 1.036248  | 3.580901  |
| C | 0.392835  | 1.762669  | 3.630134  |
| C | -0.592006 | 1.345887  | 2.759690  |
| C | 2.840116  | 1.317896  | 4.311991  |
| C | 5.083288  | -1.024070 | 4.159190  |
| C | 4.810716  | -0.970355 | 2.819278  |
| C | 4.876799  | 0.160711  | 1.943676  |
| P | 4.717658  | -0.371207 | 0.222298  |
| C | 5.958153  | -0.337297 | -0.908798 |
| C | 4.317865  | -2.180362 | 2.082315  |
| C | 4.190361  | -2.034861 | 0.753539  |
| H | 2.742853  | 2.108558  | 5.060165  |
| H | 5.527119  | -0.184822 | 4.681804  |
| H | 3.273628  | 0.395352  | 4.759611  |
| H | 4.947269  | -1.942037 | 4.721508  |
| H | 3.622505  | 1.573407  | 3.557243  |
| H | 1.939224  | -0.991819 | 2.896213  |
| H | 5.407292  | 1.065366  | 2.217615  |
| H | 2.491640  | 0.244887  | 1.814513  |
| H | 3.631198  | 0.318887  | -0.347579 |
| H | -0.731233 | -1.117583 | 2.115764  |
| H | -1.542981 | 1.848718  | 2.635614  |
| H | 3.876543  | -2.804174 | 0.061507  |
| H | 4.118088  | -3.100200 | 2.622047  |
| H | 0.277325  | 2.603147  | 4.307482  |
| H | 0.616243  | 0.705664  | -0.546430 |
| H | 6.009585  | 0.470707  | -1.630077 |
| H | -0.812548 | -0.476241 | -0.536229 |
| H | 6.845026  | -0.944178 | -0.765196 |

7e B3LYP/6-31+G\*\*/B3LYP/3-21G\* : -1182.694567

NIMAG=1

|   |           |           |           |
|---|-----------|-----------|-----------|
| C | 0.000000  | 0.000000  | 0.000000  |
| C | 0.000000  | 0.000000  | 1.388041  |
| C | 1.111038  | 0.000000  | 2.246284  |
| P | 0.614826  | -0.088423 | 3.959247  |
| N | 1.276798  | 1.027217  | 4.828253  |
| C | -1.290503 | -0.108010 | 2.153657  |
| C | -1.162455 | -0.166071 | 3.488786  |
| C | 0.058465  | -3.033047 | 0.543756  |
| P | -0.993825 | -4.440863 | -0.075106 |
| N | -2.110561 | -5.154570 | 0.739443  |
| C | 0.444561  | -5.501823 | -0.321788 |
| C | 1.602269  | -4.842950 | -0.009931 |
| C | 1.449599  | -3.499165 | 0.453949  |
| C | 2.541232  | -2.570796 | 0.790153  |
| H | 3.515600  | -3.058126 | 0.883512  |
| H | 0.918007  | 0.137316  | -0.560513 |
| H | 2.604869  | -1.780802 | 0.021344  |
| H | -0.932239 | 0.069731  | -0.551280 |
| H | 2.274394  | -1.999402 | 1.711166  |
| H | -0.065751 | -2.037184 | -0.001593 |
| H | 2.116445  | 0.236095  | 1.928888  |
| H | -0.187775 | -2.728478 | 1.575372  |
| H | 0.780846  | -1.459239 | 4.349162  |
| H | -1.252014 | -3.958418 | -1.399361 |
| H | 0.395506  | -6.511944 | -0.703765 |
| H | -1.990677 | -0.252076 | 4.181171  |
| H | -2.233264 | -0.130666 | 1.616085  |
| H | 2.585981  | -5.290228 | -0.100875 |
| H | -2.995620 | -4.718243 | 1.003968  |
| H | 1.102035  | 1.124746  | 5.832140  |
